# Supplementary material for: Spatio-Temporal Profiling of Metarhizium anisopliae—Responsive microRNAs Involved in Modulation of Plutella xylostella Immunity and Development
Source: MDPI journal article supplement (doi:10.3390/jof7110942), 2021-11-08
Supplement: s1 [file s1]

Table S7: Primers used in the study

| Name                     | Primer sequences (5' → 3')                                                       |
|--------------------------|----------------------------------------------------------------------------------|
| <i>Trypsin Psi2</i>      | <u>CCGCTCGAGATGAGCCTCCGTGGGGAGGGC</u><br><u>AAATGCGGCCGCGACGACATTGCTCAAAATCC</u> |
| <i>Mimic</i>             | <i>GUGUGGACUGUUGGCGGC</i><br><i>CGCCAACAGUCCACACUU</i>                           |
| <i>Inhibitor</i>         | <i>GC CGCC AACA GUCC ACAC</i>                                                    |
| <i>Mimic Control</i>     | <i>UUCUCCGAACGUGUCACGUTT</i><br><i>ACGUGACACGUUCGGAGAATT</i>                     |
| <i>Inhibitor Control</i> | <i>CAGUCUUUUGUGUAGUACAA</i>                                                      |
| <i>Trypsin</i>           | <i>TCATCGGTGGAGAGAACGTATC</i><br><i>ACGAAGAAGGGCACAAGC</i>                       |
| <i>Chymotrypsin</i>      | <i>TGGTGCGTCGTCCGTTAGTG</i><br><i>GCCAAAATGTACCGCCTCTA</i>                       |
| <i>NF-κB</i>             | <i>ATCAGCCATGCAGTTCCTCT</i><br><i>TGGCACAGACAGAGTTGGAG</i>                       |
| <i>C-type Lectin</i>     | <i>TGCCAGAGACACAGGAACAATCG</i><br><i>AGTGGTCGTCGAGGCTGCTG</i>                    |
| <i>βGRP</i>              | <i>CGACAGGATGATGGGGAGT</i><br><i>GGTCTGGCTTCTTGGTAGG</i>                         |
| <i>Serpin</i>            | <i>CAGGCAAGGACTCAAGTATAG</i><br><i>CTTCTACGCCATTCTTCATCA</i>                     |
| <i>Hemolin</i>           | <i>AGCTCCAGAGACTACGCCT</i><br><i>TGCACTTCAGGCTTCGGAT</i>                         |
| <i>RPS-13</i>            | <i>TCAGGCTTATTCTCGTCG</i><br><i>GCTGTGCTGGATTCTGATAC</i>                         |

Underline = Restriction enzymes
